# Supplementary material
Source: publisher site journal article supplement (https://www.spandidos-publications.com/1365/downloadSupplementary)
Supplement: Supplementary file 1 [file downloadSupplementary]

## Sheet: Sheet1
Table SI. List of the differentially expressed proteins identified in mononuclear cells from patients with multiple myeloma using label-free quantitative analysis. FC, fold change; FDR, false discovery rate.
Serial No.	Accession	Description	Fold Change	log2(FC)	P-value	log10 P-value	FDR adjusted P-value
1	P30043	Flavin reductase NADPH OSHomo sapiens OX9606 GNBLVRB PE1 SV3	22.801	4.511	2.46x10-7	6.6095	2.40x10-6
2	A0A0J9YXX1	Immunoglobulin heavy variable 5-10-1 OSHomo sapiens OX9606 GNIGHV5-10-1 PE3 SV1	19.497	4.2852	4.62x10-5	4.3353	9.59x10-5
3	P01023	α-2-macroglobulin OSHomo sapiens OX9606 GNA2M PE1 SV3α	17.171	4.1019	4.32x10-5	4.365	9.03x10-5
4	P08603	Complement factor H OSHomo sapiens OX9606 GNCFH PE1 SV4	15.636	3.9668	2.93x10-6	5.5329	1.20x10-5
5	P04003	C4b-binding protein α chain OSHomo sapiens OX9606 GNC4BPA PE1 SV2	14.925	3.8997	1.2x10-4	3.8922	2.4x10-4
6	P04004	Vitronectin OSHomo sapiens OX9606 GNVTN PE1 SV1	14.556	3.8635	1.47x10-5	4.8329	3.95x10-5
7	P01011	α-1-antichymotrypsin OSHomo sapiens OX9606 GNSERPINA3 PE1 SV2	12.607	3.6561	8.41x10-5	4.0751	1.6x10-4
8	P80748	Immunoglobulin λ variable 3-21 OSHomo sapiens OX9606 GNIGLV3-21 PE1 SV2	12.425	3.6352	2.95x10-5	4.5304	6.64x10-5
9	A0A0B4J2B5	Immunoglobulin heavy variable 3/OR16-9 non-functional Fragment OSHomo sapiens OX9606 GNIGHV3OR16-9 PE1 SV1	11.104	3.473	4.51x10-5	4.3462	9.39x10-5
10	P0DOY3	Immunoglobulin λ constant 3 OSHomo sapiens OX9606 GNIGLC3 PE1 SV1	11.092	3.4714	2.43x10-5	4.614	5.67x10-5
11	P01859	Immunoglobulin heavy constant γ 2 OSHomo sapiens OX9606 GNIGHG2 PE1 SV2	10.814	3.4348	1.12x10-4	3.9491	2.14x10-4
12	Q8WU39	Marginal zone B- and B1-cell-specific protein OSHomo sapiens OX9606 GNMZB1 PE1 SV1	10.579	3.4031	5.47x10-4	3.2618	8.74x10-4
13	P02647	Apolipoprotein A-I OSHomo sapiens OX9606 GNAPOA1 PE1 SV1	9.9822	3.3194	3.93x10-5	4.4053	8.42x10-5
14	P01591	Immunoglobulin J chain OSHomo sapiens OX9606 GNJCHAIN PE1 SV4	9.8085	3.294	1.60x10-5	4.7946	4.22x10-5
15	P02774-3	Isoform 3 of Vitamin D-binding protein OSHomo sapiens OX9606 GNGC	9.5851	3.2608	2.44x10-6	5.6132	1.06x10-5
16	P01024	Complement C3 OSHomo sapiens OX9606 GNC3 PE1 SV2	9.3759	3.229	7.29x10-6	5.137	2.23x10-5
17	P00450	Ceruloplasmin OSHomo sapiens OX9606 GNCP PE1 SV1	9.0324	3.1751	1.15x10-5	4.9386	3.28x10-5
18	P01871-2	Isoform 2 of Immunoglobulin heavy constant mu OSHomo sapiens OX9606 GNIGHM	7.9769	2.9958	2.04x10-5	4.6903	5.0x10-5
19	A0A286YEY1	Immunoglobulin heavy constant α 1 Fragment OSHomo sapiens OX9606 GNIGHA1 PE1 SV1	7.2064	2.8493	9.55x10-3	3.0199	1.44x10-4
20	P78371	T-complex protein 1 subunit β OSHomo sapiens OX9606 GNCCT2 PE1 SV4	7.0296	2.8134	1.4x10-2	3.8477	2.62x10-4
21	P02749	β-2-glycoprotein 1 OSHomo sapiens OX9606 GNAPOH PE1 SV3	6.987	2.8047	7.66x10-6	5.1156	2.31x10-5
22	A0A0A0MRJ7	Coagulation factor V OSHomo sapiens OX9606 GNF5 PE1 SV1	6.8708	2.7805	1.97x10-5	4.7057	4.86x10-5
23	A0A286YES1	Immunoglobulin heavy constant γ 3 Fragment OSHomo sapiens OX9606 GNIGHG3 PE1 SV1	6.4261	2.684	1.14x10-5	4.8513	3.85x10-5
24	A0A286YFJ8	Immunoglobulin heavy constant γ 4 Fragment OSHomo sapiens OX9606 GNIGHG4 PE1 SV1	6.1731	2.626	4.94x10-6	5.3065	1.73x10-5
25	Q4KMQ2-2	Isoform 2 of Anoctamin-6 OSHomo sapiens OX9606 GNANO6	6.1016	2.6092	7.84x10-6	5.1057	2.35x10-5
26	H0YI09	Methyltransferase-like protein 7A Fragment OSHomo sapiens OX9606 GNMETTL7A PE1 SV1	6.0974	2.6082	1.41x10-6	5.8498	7.35x10-6
27	Q08380	Galectin-3-binding protein OSHomo sapiens OX9606 GNLGALS3BP PE1 SV1	5.5408	2.4701	6.53x10-4	3.1849	1.02x10-4
28	P00747	Plasminogen OSHomo sapiens OX9606 GNPLG PE1 SV2	5.4832	2.455	1.03x10-6	5.9874	5.98x10-6
29	Q9H4B7	Tubulin β-1 chain OSHomo sapiens OX9606 GNTUBB1 PE1 SV1	5.3482	2.419	9.94x10-6	5.0027	2.88x10-5
30	P02786	Transferrin receptor protein 1 OSHomo sapiens OX9606 GNTFRC PE1 SV2	4.8934	2.2908	2.01x10-6	5.6972	8.96x10-6
31	P28331-2	Isoform 2 of NADH-ubiquinone oxidoreductase 75 kDa subunit, mitochondrial OSHomo sapiens OX9606 GNNDUFS1	4.8427	2.2758	4.17x10-5	4.3796	8.85x10-5
32	P36551	Oxygen-dependent coproporphyrinogen-III oxidase, mitochondrial OSHomo sapiens OX9606 GNCPOX PE1 SV3	4.7445	2.2462	5.33x10-6	5.2732	1.82x10-5
33	P46977	Dolichyl-diphosphooligosaccharide--protein glycosyltransferase subunit STT3A OSHomo sapiens OX9606 GNSTT3A PE1 SV2	4.3804	2.1311	5.74x10-6	5.2411	1.91x10-5
34	Q9Y277	Voltage-dependent anion-selective channel protein 3 OSHomo sapiens OX9606 GNVDAC3 PE1 SV1	4.2194	2.077	8.13x10-5	4.09	1.59x10-4
35	Q9Y2Q0	Phospholipid-transporting ATPase IA OSHomo sapiens OX9606 GNATP8A1 PE1 SV1	3.6832	1.881	1.44x10-4	3.8392	2.65x10-3
36	P02790	Hemopexin OSHomo sapiens OX9606 GNHPX PE1 SV2	3.411	1.7702	4.83x10-6	5.3156	1.71x10-5
37	P02549	Spectrin α chain, erythrocytic 1 OSHomo sapiens OX9606 GNSPTA1 PE1 SV5	3.394	1.763	2.67x10-6	5.5736	1.13x10-5
38	P13987-2	Isoform 2 of CD59 glycoprotein OSHomo sapiens OX9606 GNCD59	3.3874	1.7602	1.89x10-5	4.723	4.81x10-5
39	P02766	Transthyretin OSHomo sapiens OX9606 GNTTR PE1 SV1	3.3852	1.7593	3.75x10-5	4.4264	8.05x10-5
40	P02545	Prelamin-A/C OSHomo sapiens OX9606 GNLMNA PE1 SV1	3.3555	1.7465	9.69x10-7	6.0137	5.94x10-6
41	P45880-1	Isoform 1 of Voltage-dependent anion-selective channel protein 2 OSHomo sapiens OX9606 GNVDAC2	3.3536	1.7457	2.25x10-5	4.6486	5.34x10-5
42	C9JJQ8	Tubulin α chain Fragment OSHomo sapiens OX9606 GNTUBA4A PE1 SV1	3.3384	1.7392	5.36x10-6	5.2708	1.82x10-5
43	P47985	Cytochrome b-c1 complex subunit Rieske, mitochondrial OSHomo sapiens OX9606 GNUQCRFS1 PE1 SV2	3.2402	1.6961	6.88x10-6	5.1624	2.13x10-5
44	Q13231	Chitotriosidase-1 OSHomo sapiens OX9606 GNCHIT1 PE1 SV1	3.1777	1.668	1.69x10-5	4.7709	4.38x10-5
45	U3KPT8	Histone H2B type 1-J Fragment OSHomo sapiens OX9606 GNHIST1H2BJ PE4 SV1	3.083	1.6243	1.03x10-4	3.9854	1.98x10-4
46	P10909-5	Isoform 5 of Clusterin OSHomo sapiens OX9606 GNCLU	3.0419	1.605	1.65x10-5	4.7817	4.30x10-5
47	P16157-14	Isoform Er13 of Ankyrin-1 OSHomo sapiens OX9606 GNANK1	3.0153	1.5923	1.18x10-6	5.9275	6.42x10-6
48	P00505	Aspartate aminotransferase, mitochondrial OSHomo sapiens OX9606 GNGOT2 PE1 SV3	3.0068	1.5882	1.32x10-5	4.878	3.64x10-5
49	Q93050-3	Isoform 3 of V-type proton ATPase 116 kDa subunit a isoform 1 OSHomo sapiens OX9606 GNATP6V0A1	2.9655	1.5683	7.25x10-8	7.14	1.29x10-6
50	P21912	Succinate dehydrogenase ubiquinone iron-sulfur subunit, mitochondrial OSHomo sapiens OX9606 GNSDHB PE1 SV3	2.9028	1.5374	5.52x10-4	2.2576	7.34x10-4
51	P02730	Band 3 anion transport protein OSHomo sapiens OX9606 GNSLC4A1 PE1 SV3	2.8783	1.5252	1.56x10-5	4.8081	4.13x10-5
52	P61604	10 kDa heat shock protein, mitochondrial OSHomo sapiens OX9606 GNHSPE1 PE1 SV2	2.8432	1.5075	1.92x10-6	5.7168	8.78x10-6
53	P12270	Nucleoprotein TPR OSHomo sapiens OX9606 GNTPR PE1 SV3	2.8426	1.5072	1.19x10-5	4.9228	3.38x10-5
54	P11277-2	Isoform 2 of Spectrin β chain, erythrocytic OSHomo sapiens OX9606 GNSPTB	2.7932	1.4819	4.20x10-6	5.3764	1.58x10-5
55	Q6P2Q9	Pre-mRNA-processing-splicing factor 8 OSHomo sapiens OX9606 GNPRPF8 PE1 SV2	2.736	1.4521	6.09x10-6	5.2153	1.97x10-5
56	O75489	NADH dehydrogenase ubiquinone iron-sulfur protein 3, mitochondrial OSHomo sapiens OX9606 GNNDUFS3 PE1 SV1	2.72	1.4436	4.12x10-5	4.3847	8.79x10-5
57	P24752	Acetyl-CoA acetyltransferase, mitochondrial OSHomo sapiens OX9606 GNACAT1 PE1 SV1	2.6946	1.43	4.01x10-6	5.3972	1.52x10-5
58	Q13011	δ3,5-δ2,4-dienoyl-CoA isomerase, mitochondrial OSHomo sapiens OX9606 GNECH1 PE1 SV2	2.6931	1.4293	1.65x10-5	4.7818	4.30x10-5
59	P35232	Prohibitin OSHomo sapiens OX9606 GNPHB PE1 SV1	2.6823	1.4235	4.58x10-6	5.339	1.68x10-5
60	P10606	Cytochrome c oxidase subunit 5B, mitochondrial OSHomo sapiens OX9606 GNCOX5B PE1 SV2	2.682	1.4233	2.12x10-6	5.6747	9.35x10-6
61	Q9H9B4	Sideroflexin-1 OSHomo sapiens OX9606 GNSFXN1 PE1 SV4	2.6796	1.422	4.78x10-6	5.3202	1.70x10-5
62	A0A087WUC6	Signal peptidase complex subunit 2 OSHomo sapiens OX9606 GNSPCS2 PE1 SV1	2.6021	1.3797	3.29x10-5	4.4827	7.27x10-5
63	O00194	Ras-related protein Rab-27B OSHomo sapiens OX9606 GNRAB27B PE1 SV4	2.5968	1.3767	6.43x10-5	4.1916	1.31x10-4
64	P22695	Cytochrome b-c1 complex subunit 2, mitochondrial OSHomo sapiens OX9606 GNUQCRC2 PE1 SV3	2.5742	1.3641	6.09x10-6	5.1613	2.13x10-5
65	Q8NBS9	Thioredoxin domain-containing protein 5 OSHomo sapiens OX9606 GNTXNDC5 PE1 SV2	2.5282	1.3381	7.19x10-6	5.1433	2.21x10-5
66	P24539	ATP synthase F0 complex subunit B1, mitochondrial OSHomo sapiens OX9606 GNATP5PB PE1 SV2	2.5048	1.3247	6.63x10-6	5.1783	2.08x10-5
67	P04275	von Willebrand factor OSHomo sapiens OX9606 GNVWF PE1 SV4	2.414	1.2714	2.88x10-6	5.5412	1.19x10-5
68	P05023	Sodium/potassium-transporting ATPase subunit α-1 OSHomo sapiens OX9606 GNATP1A1 PE1 SV1	2.4136	1.2712	2.23x10-5	4.6508	5.34x10-5
69	P49748-3	Isoform 3 of Very long-chain specific acyl-CoA dehydrogenase, mitochondrial OSHomo sapiens OX9606 GNACADVL	2.4043	1.2656	5.21x10-6	5.2829	1.80x10-5
70	P35908	Keratin, type II cytoskeletal 2 epidermal OSHomo sapiens OX9606 GNKRT2 PE1 SV2	2.3861	1.2546	9.38x10-8	7.028	1.34x10-6
71	A0A140T9X5	HLA class I histocompatibility antigen, A-3 α chain Fragment OSHomo sapiens OX9606 GNHLA-A PE1 SV1	2.3348	1.2233	3.82x10-6	5.4175	1.48x10-5
72	P31040	Succinate dehydrogenase ubiquinone flavoprotein subunit, mitochondrial OSHomo sapiens OX9606 GNSDHA PE1 SV2	2.322	1.2154	8.11x10-7	6.0908	5.46x10-6
73	P42677	40S ribosomal protein S27 OSHomo sapiens OX9606 GNRPS27 PE1 SV3	2.3095	1.2076	9.91x10-6	5.004	2.88x10-5
74	Q99623	Prohibitin-2 OSHomo sapiens OX9606 GNPHB2 PE1 SV2	2.2923	1.1968	1.06x10-6	5.9759	6.01x10-6
75	P31930	Cytochrome b-c1 complex subunit 1, mitochondrial OSHomo sapiens OX9606 GNUQCRC1 PE1 SV3	2.2252	1.1539	3.15x10-6	5.5012	1.27x10-5
76	Q00325	Phosphate carrier protein, mitochondrial OSHomo sapiens OX9606 GNSLC25A3 PE1 SV2	2.2187	1.1497	4.25x10-6	5.3721	1.58x10-5
77	Q16531	DNA damage-binding protein 1 OSHomo sapiens OX9606 GNDDB1 PE1 SV1	2.119	1.0834	1.97x10-6	4.7055	4.86x10-5
78	Q9NZ08	Endoplasmic reticulum aminopeptidase 1 OSHomo sapiens OX9606 GNERAP1 PE1 SV3	2.0722	1.0512	2.79x10-5	4.5543	6.38x10-5
79	P07437	Tubulin β chain OSHomo sapiens OX9606 GNTUBB PE1 SV2	2.0222	1.0159	2.37x10-5	4.6261	5.57x10-5
80	P50453	Serpin B9 OSHomo sapiens OX9606 GNSERPINB9 PE1 SV1	0.49877	-1.0035	4.85x10-4	3.3135	7.91x10-4
81	O75874	Isocitrate dehydrogenase NADP cytoplasmic OSHomo sapiens OX9606 GNIDH1 PE1 SV2	0.49871	-1.0037	1.13x10-5	4.9482	3.23x10-5
82	P62820	Ras-related protein Rab-1A OSHomo sapiens OX9606 GNRAB1A PE1 SV3	0.49507	-1.0143	1.32x10-7	6.8785	1.56x10-6
83	P09972	Fructose-bisphosphate aldolase C OSHomo sapiens OX9606 GNALDOC PE1 SV2	0.49384	-1.0179	1.95x10-6	5.7097	8.79x10-6
84	Q6IBS0	Twinfilin-2 OSHomo sapiens OX9606 GNTWF2 PE1 SV2	0.49219	-1.0227	5.94x10-4	3.2257	9.45x10-4
85	Q5TEC6	Histone H3 OSHomo sapiens OX9606 GNHIST2H3PS2 PE1 SV1	0.48844	-1.0337	1.68x10-6	5.7738	8.12x10-6
86	P0DP25	Calmodulin-3 OSHomo sapiens OX9606 GNCALM3 PE1 SV1	0.48714	-1.0376	1.29x10-5	4.8889	3.57x10-5
87	P08758	Annexin A5 OSHomo sapiens OX9606 GNANXA5 PE1 SV2	0.48497	-1.044	1.54x10-7	6.8127	1.73x10-6
88	O00602	Ficolin-1 OSHomo sapiens OX9606 GNFCN1 PE1 SV2	0.48457	-1.0452	1.83x10-7	6.7386	1.96x10-6
89	Q15907	Ras-related protein Rab-11B OSHomo sapiens OX9606 GNRAB11B PE1 SV4	0.48409	-1.0467	1.66x10-7	6.7798	1.83x10-6
90	P61160	Actin-related protein 2 OSHomo sapiens OX9606 GNACTR2 PE1 SV1	0.48351	-1.0484	4.30x10-5	4.3663	9.03x10-5
91	P07948	Tyrosine-protein kinase Lyn OSHomo sapiens OX9606 GNLYN PE1 SV3	0.48143	-1.0546	5.34x10-4	3.2723	8.59x10-4
92	P58546	Myotrophin OSHomo sapiens OX9606 GNMTPN PE1 SV2	0.47726	-1.0672	3.14x10-7	6.5035	2.75x10-6
93	F6TLX2	Glyoxalase domain-containing protein 4 OSHomo sapiens OX9606 GNGLOD4 PE1 SV1	0.47573	-1.0718	2.64x10-7	6.5784	2.40x10-6
94	P52565	Rho GDP-dissociation inhibitor 1 OSHomo sapiens OX9606 GNARHGDIA PE1 SV3	0.47541	-1.0728	1.93x10-6	5.7144	8.78x10-6
95	P19878	Neutrophil cytosol factor 2 OSHomo sapiens OX9606 GNNCF2 PE1 SV2	0.47397	-1.0771	3.88x10-6	5.4107	1.49x10-5
96	Q9H4A4	Aminopeptidase B OSHomo sapiens OX9606 GNRNPEP PE1 SV2	0.47307	-1.0799	1.26x10-4	3.8981	2.38x10-3
97	Q96C19	EF-hand domain-containing protein D2 OSHomo sapiens OX9606 GNEFHD2 PE1 SV1	0.47203	-1.083	1.80x10-6	5.7437	8.46x10-6
98	B4DUT8	Calponin OSHomo sapiens OX9606 GNCNN2 PE1 SV1	0.47143	-1.0849	8.07x10-7	6.0929	5.46x10-6
99	P50995	Annexin A11 OSHomo sapiens OX9606 GNANXA11 PE1 SV1	0.47042	-1.088	8.73x10-8	7.0591	1.29x10-6
100	O95336	6-phosphogluconolactonase OSHomo sapiens OX9606 GNPGLS PE1 SV2	0.47013	-1.0889	7.42x10-7	6.1298	5.16x10-6
101	P09874	Poly ADP-ribose polymerase 1 OSHomo sapiens OX9606 GNPARP1 PE1 SV4	0.46958	-1.0906	2.60x10-6	5.5848	1.11x10-5
102	Q16769	Glutaminyl-peptide cyclotransferase OSHomo sapiens OX9606 GNQPCT PE1 SV1	0.46593	-1.1018	2.58x10-5	4.5891	5.94x10-5
103	G3V180	Dipeptidyl peptidase 3 OSHomo sapiens OX9606 GNDPP3 PE1 SV1	0.46439	-1.1066	4.31x10-5	4.3652	9.03x10-5
104	P52790	Hexokinase-3 OSHomo sapiens OX9606 GNHK3 PE1 SV2	0.46439	-1.1066	3.57x10-6	5.4469	1.41x10-5
105	E7EPK1	Septin-7 OSHomo sapiens OX9606 GNSEPT7 PE1 SV2	0.46403	-1.1077	4.37x10-6	5.3598	1.61x10-5
106	Q9H299	SH3 domain-binding glutamic acid-rich-like protein 3 OSHomo sapiens OX9606 GNSH3BGRL3 PE1 SV1	0.45669	-1.1307	8.29x10-8	7.0813	1.29x10-6
107	P61088	Ubiquitin-conjugating enzyme E2 N OSHomo sapiens OX9606 GNUBE2N PE1 SV1	0.44896	-1.1554	4.62x10-6	5.3354	1.68x10-5
108	P09429	High mobility group protein B1 OSHomo sapiens OX9606 GNHMGB1 PE1 SV3	0.44814	-1.158	4.45x10-8	7.352	1.05x10-6
109	P10599	Thioredoxin OSHomo sapiens OX9606 GNTXN PE1 SV3	0.44734	-1.1606	3.69x10-6	5.4331	1.44x10-5
110	P61026	Ras-related protein Rab-10 OSHomo sapiens OX9606 GNRAB10 PE1 SV1	0.44732	-1.1606	4.06x10-4	3.6326	4.06x10-4
111	P00558	Phosphoglycerate kinase 1 OSHomo sapiens OX9606 GNPGK1 PE1 SV3	0.44665	-1.1628	4.50x10-12	11.347	2.13x10-9
112	P36222	Chitinase-3-like protein 1 OSHomo sapiens OX9606 GNCHI3L1 PE1 SV2	0.44192	-1.1782	1.34x10-6	5.8732	7.04x10-6
113	Q9NVJ2	ADP-ribosylation factor-like protein 8B OSHomo sapiens OX9606 GNARL8B PE1 SV1	0.43989	-1.1848	4.92x10-9	8.3083	3.02x10-7
114	P05771-2	Isoform β-II of Protein kinase C β type OSHomo sapiens OX9606 GNPRKCB	0.43436	-1.203	7.42x10-5	4.1296	1.47x10-4
115	P50552	Vasodilator-stimulated phosphoprotein OSHomo sapiens OX9606 GNVASP PE1 SV3	0.43045	-1.2161	4.27x10-7	6.3694	3.41x10-6
116	P52209	6-phosphogluconate dehydrogenase, decarboxylating OSHomo sapiens OX9606 GNPGD PE1 SV3	0.42992	-1.2179	6.25x10-8	7.2043	1.28x10-6
117	P46940	Ras GTPase-activating-like protein IQGAP1 OSHomo sapiens OX9606 GNIQGAP1 PE1 SV1	0.42728	-1.2267	1.02x10-6	5.9897	5.98x10-6
118	P61204	ADP-ribosylation factor 3 OSHomo sapiens OX9606 GNARF3 PE1 SV2	0.42539	-1.2331	5.11x10-9	8.2918	3.02x10-7
119	O15145	Actin-related protein 2/3 complex subunit 3 OSHomo sapiens OX9606 GNARPC3 PE1 SV3	0.42064	-1.2493	1.28x10-7	6.8923	1.56x10-6
120	P15153	Ras-related C3 botulinum toxin substrate 2 OSHomo sapiens OX9606 GNRAC2 PE1 SV1	0.41853	-1.2566	4.56x10-7	6.3408	3.54x10-6
121	O60234	Glia maturation factor γ OSHomo sapiens OX9606 GNGMFG PE1 SV1	0.41699	-1.2619	9.90x10-7	6.0045	5.94x10-6
122	Q6UX06	Olfactomedin-4 OSHomo sapiens OX9606 GNOLFM4 PE1 SV1	0.41589	-1.2657	2.15x10-7	6.6681	2.16x10-6
123	P26583	High mobility group protein B2 OSHomo sapiens OX9606 GNHMGB2 PE1 SV2	0.41588	-1.2658	3.73x10-7	6.4278	3.08x10-6
124	P37108	Signal recognition particle 14 kDa protein OSHomo sapiens OX9606 GNSRP14 PE1 SV2	0.41444	-1.2708	4.86x10-4	3.3128	7.91x10-4
125	O14745	Na/H exchange regulatory cofactor NHE-RF1 OSHomo sapiens OX9606 GNSLC9A3R1 PE1 SV4	0.40809	-1.293	2.14x10-6	5.6704	9.36x10-6
126	Q99536	Synaptic vesicle membrane protein VAT-1 homolog OSHomo sapiens OX9606 GNVAT1 PE1 SV2	0.40765	-1.2946	2.47x10-8	7.6079	7.83x10-7
127	P33241	Lymphocyte-specific protein 1 OSHomo sapiens OX9606 GNLSP1 PE1 SV1	0.40737	-1.2956	1.96x10-7	6.7071	2.06x10-6
128	P06703	Protein S100-A6 OSHomo sapiens OX9606 GNS100A6 PE1 SV1	0.40459	-1.3055	1.32x10-4	3.8766	2.46x10-4
129	C9JIF9	Acylamino-acid-releasing enzyme OSHomo sapiens OX9606 GNAPEH PE1 SV1	0.39964	-1.3232	1.22x10-7	6.9137	1.56x10-6
130	Q9NUQ9	Protein FAM49B OSHomo sapiens OX9606 GNFAM49B PE1 SV1	0.39773	-1.3301	7.09x10-8	7.1492	1.29x10-6
131	P25815	Protein S100-P OSHomo sapiens OX9606 GNS100P PE1 SV2	0.39579	-1.3372	1.53x10-6	5.8158	7.77x10-6
132	P28482	Mitogen-activated protein kinase 1 OSHomo sapiens OX9606 GNMAPK1 PE1 SV3	0.39473	-1.3411	3.57x10-8	7.4471	9.88x10-7
133	P14174	Macrophage migration inhibitory factor OSHomo sapiens OX9606 GNMIF PE1 SV4	0.38975	-1.3594	1.97x10-5	4.7065	4.86x10-5
134	P18669	Phosphoglycerate mutase 1 OSHomo sapiens OX9606 GNPGAM1 PE1 SV2	0.38842	-1.3643	6.10x10-6	5.2148	1.97x10-5
135	P00338	L-lactate dehydrogenase A chain OSHomo sapiens OX9606 GNLDHA PE1 SV2	0.38393	-1.3811	1.02x10-7	6.9921	1.38x10-6
136	P52907	F-actin-capping protein subunit α-1 OSHomo sapiens OX9606 GNCAPZA1 PE1 SV3	0.38334	-1.3833	1.07x10-6	5.9697	6.01x10-6
137	P30041	Peroxiredoxin-6 OSHomo sapiens OX9606 GNPRDX6 PE1 SV3	0.38022	-1.3951	3.16x10-6	5.5002	1.27x10-5
138	Q99497	Protein/nucleic acid deglycase DJ-1 OSHomo sapiens OX9606 GNPARK7 PE1 SV2	0.3795	-1.3978	7.62x10-8	7.1181	1.29x10-6
139	P47755	F-actin-capping protein subunit α-2 OSHomo sapiens OX9606 GNCAPZA2 PE1 SV3	0.37933	-1.3985	1.64x10-6	5.7859	8.07x10-6
140	P02776	Platelet factor 4 OSHomo sapiens OX9606 GNPF4 PE1 SV2	0.3786	-1.4013	6.11x10-5	4.2142	1.25x10-4
141	P11717	Cation-independent mannose-6-phosphate receptor OSHomo sapiens OX9606 GNIGF2R PE1 SV3	0.3751	-1.4146	7.13x10-7	6.1471	5.03x10-6
142	A0A2R8Y5N1	Protein diaphanous homolog 1 OSHomo sapiens OX9606 GNDIAPH1 PE1 SV1	0.37342	-1.4211	1.54x10-4	1.8109	1.94x10-4
143	P62942	Peptidyl-prolyl cis-trans isomerase FKBP1A OSHomo sapiens OX9606 GNFKBP1A PE1 SV2	0.37261	-1.4243	3.76x10-8	7.425	9.88x10-7
144	P49720	Proteasome subunit β type-3 OSHomo sapiens OX9606 GNPSMB3 PE1 SV2	0.37167	-1.4279	1.42x10-4	3.8454	2.62x10-4
145	Q9UNZ2-6	Isoform 4 of NSFL1 cofactor p47 OSHomo sapiens OX9606 GNNSFL1C	0.36581	-1.4508	8.31x10-7	6.0805	5.46x10-6
146	Q14019	Coactosin-like protein OSHomo sapiens OX9606 GNCOTL1 PE1 SV3	0.36417	-1.4573	8.71x10-8	7.0599	1.29x10-6
147	J3KPD6	Tyrosine-protein kinase OSHomo sapiens OX9606 GNHCK PE1 SV1	0.36265	-1.4633	4.78x10-6	5.3205	1.70x10-5
148	P11413-3	Isoform 3 of Glucose-6-phosphate 1-dehydrogenase OSHomo sapiens OX9606 GNG6PD	0.35983	-1.4746	1.26x10-8	7.8998	5.96x10-7
149	O75563	Src kinase-associated phosphoprotein 2 OSHomo sapiens OX9606 GNSKAP2 PE1 SV1	0.35638	-1.4885	6.02x10-8	7.2202	1.28x10-6
150	Q01518	Adenylyl cyclase-associated protein 1 OSHomo sapiens OX9606 GNCAP1 PE1 SV5	0.35201	-1.5063	2.78x10-9	8.5558	2.63x10-7
151	Q9H0U4	Ras-related protein Rab-1B OSHomo sapiens OX9606 GNRAB1B PE1 SV1	0.35009	-1.5142	1.89x10-6	5.7231	8.77x10-6
152	P23381	Tryptophan--tRNA ligase, cytoplasmic OSHomo sapiens OX9606 GNWARS PE1 SV2	0.34546	-1.5334	8.47x10-7	6.0723	5.46x10-6
153	A0A0C4DGQ5	Calpain small subunit 1 OSHomo sapiens OX9606 GNCAPNS1 PE1 SV1	0.34469	-1.5366	6.26x10-6	5.2031	2.00x10-5
154	P53621	Coatomer subunit α OSHomo sapiens OX9606 GNCOPA PE1 SV2	0.3443	-1.5383	6.13x10-6	5.2124	1.97x10-5
155	Q03252	Lamin-B2 OSHomo sapiens OX9606 GNLMNB2 PE1 SV4	0.34378	-1.5404	2.56x10-7	6.5924	2.40x10-6
156	O95497	Pantetheinase OSHomo sapiens OX9606 GNVNN1 PE1 SV2	0.34364	-1.541	1.30x10-4	3.8831	2.43x10-4
157	P23229	Integrin α-6 OSHomo sapiens OX9606 GNITGA6 PE1 SV5	0.34119	-1.5514	8.89x10-7	6.0509	5.61x10-6
158	Q9UL25	Ras-related protein Rab-21 OSHomo sapiens OX9606 GNRAB21 PE1 SV3	0.34043	-1.5546	1.30x10-7	6.8847	1.56x10-6
159	P22626-2	Isoform A2 of Heterogeneous nuclear ribonucleoproteins A2/B1 OSHomo sapiens OX9606 GNHNRNPA2B1	0.33977	-1.5574	2.60x10-7	6.5844	2.40x10-6
160	P41218	Myeloid cell nuclear differentiation antigen OSHomo sapiens OX9606 GNMNDA PE1 SV1	0.33629	-1.5722	1.80x10-9	8.7458	2.12x10-7
161	P01040	Cystatin-A OSHomo sapiens OX9606 GNCSTA PE1 SV1	0.33383	-1.5828	5.08x10-7	6.2938	3.81x10-6
162	A0A0U1RRH7	Histone H2A OSHomo sapiens OX9606 PE3 SV1	0.32749	-1.6105	1.52x10-6	5.8168	7.77x10-6
163	Q01459	Di-N-acetylchitobiase OSHomo sapiens OX9606 GNCTBS PE1 SV1	0.3174	-1.6556	1.66x10-6	5.779	8.11x10-6
164	X6RFL8	Ras-related protein Rab-14 Fragment OSHomo sapiens OX9606 GNRAB14 PE1 SV1	0.31519	-1.6657	3.31x10-6	5.4801	1.32x10-5
165	P09525	Annexin A4 OSHomo sapiens OX9606 GNANXA4 PE1 SV4	0.31383	-1.672	4.33x10-7	6.3637	3.41x10-6
166	P40121	Macrophage-capping protein OSHomo sapiens OX9606 GNCAPG PE1 SV2	0.31363	-1.6729	6.88x10-8	7.1625	1.29x10-6
167	P16050	Arachidonate 15-lipoxygenase OSHomo sapiens OX9606 GNALOX15 PE1 SV3	0.31061	-1.6868	1.46x10-7	6.8363	1.68x10-6
168	P51149	Ras-related protein Rab-7a OSHomo sapiens OX9606 GNRAB7A PE1 SV1	0.30904	-1.6941	1.56x10-6	5.8078	7.83x10-6
169	P39687	Acidic leucine-rich nuclear phosphoprotein 32 family member A OSHomo sapiens OX9606 GNANP32A PE1 SV1	0.30746	-1.7016	4.87x10-7	6.3121	3.721x10-6
170	P06737	Glycogen phosphorylase, liver form OSHomo sapiens OX9606 GNPYGL PE1 SV4	0.30442	-1.7159	1.80x10-8	7.7457	6.65x10-7
171	Q96P48	Arf-GAP with Rho-GAP domain, ANK repeat and PH domain-containing protein 1 OSHomo sapiens OX9606 GNARAP1 PE1 SV3	0.30139	-1.7303	3.22x10-5	4.492	7.15x10-5
172	O00764	Pyridoxal kinase OSHomo sapiens OX9606 GNPDXK PE1 SV1	0.3011	-1.7317	6.66x10-5	4.1762	1.35x10-3
173	O75368	SH3 domain-binding glutamic acid-rich-like protein OSHomo sapiens OX9606 GNSH3BGRL PE1 SV1	0.29435	-1.7644	1.03x10-4	3.9851	1.98x10-4
174	P06702	Protein S100-A9 OSHomo sapiens OX9606 GNS100A9 PE1 SV1	0.28401	-1.816	2.65x10-8	7.5772	7.83x10-7
175	P23528	Cofilin-1 OSHomo sapiens OX9606 GNCFL1 PE1 SV3	0.28324	-1.8199	3.62x10-7	6.4412	3.06x10-6
176	P09467	Fructose-1,6-bisphosphatase 1 OSHomo sapiens OX9606 GNFBP1 PE1 SV5	0.2825	-1.8237	1.59x10-6	5.8	7.89x10-6
177	P55786	Puromycin-sensitive aminopeptidase OSHomo sapiens OX9606 GNNPEPPS PE1 SV2	0.27494	-1.8628	3.45x10-5	4.4616	7.53x10-5
178	P05089	Arginase-1 OSHomo sapiens OX9606 GNARG1 PE1 SV2	0.26987	-1.8897	2.54x10-8	7.5943	7.83x10-7
179	P05109	Protein S100-A8 OSHomo sapiens OX9606 GNS100A8 PE1 SV1	0.26917	-1.8934	1.02x10-7	6.9907	1.38x10-6
180	E7EUC7	UTP--glucose-1-phosphate uridylyltransferase OSHomo sapiens OX9606 GNUGP2 PE1 SV1	0.26492	-1.9164	7.65x10-8	7.1161	1.29x10-6
181	P61978-3	Isoform 3 of Heterogeneous nuclear ribonucleoprotein K OSHomo sapiens OX9606 GNHNRNPK	0.26386	-1.9222	1.04x10-6	5.9845	5.98x10-6
182	P48595	Serpin B10 OSHomo sapiens OX9606 GNSERPINB10 PE1 SV1	0.26233	-1.9306	4.77x10-8	7.3213	1.07x10-6
183	O75131	Copine-3 OSHomo sapiens OX9606 GNCPNE3 PE1 SV1	0.26123	-1.9366	7.72x10-9	8.1126	4.06x10-7
184	P09960	Leukotriene A-4 hydrolase OSHomo sapiens OX9606 GNLTA4H PE1 SV2	0.25538	-1.9693	4.44x10-8	7.3531	1.05x10-6
185	P84095	Rho-related GTP-binding protein RhoG OSHomo sapiens OX9606 GNRHOG PE1 SV1	0.25302	-1.9827	2.62x10-7	6.5811	2.40x10-6
186	P52566	Rho GDP-dissociation inhibitor 2 OSHomo sapiens OX9606 GNARHGDIB PE1 SV3	0.24968	-2.0018	1.25x10-6	5.9023	6.73x10-6
187	P32320	Cytidine deaminase OSHomo sapiens OX9606 GNCDA PE1 SV2	0.24923	-2.0044	1.62x10-9	8.7904	2.12x10-7
188	P04908	Histone H2A type 1-B/E OSHomo sapiens OX9606 GNHIST1H2AB PE1 SV2	0.24457	-2.0317	9.02x10-7	6.0449	5.61x10-6
189	P07384	Calpain-1 catalytic subunit OSHomo sapiens OX9606 GNCAPN1 PE1 SV1	0.217	-2.2042	4.69x10-6	5.3289	1.69x10-5
190	P35754	Glutaredoxin-1 OSHomo sapiens OX9606 GNGLRX PE1 SV2	0.14962	-2.7406	1.47x10-8	7.8329	6.32x10-7
191	Q05315	Galectin-10 OSHomo sapiens OX9606 GNCLC PE1 SV3	0.13029	-2.9402	4.61x10-9	8.3363	3.02x10-7
192	P02775	Platelet basic protein OSHomo sapiens OX9606 GNPPBP PE1 SV3	0.12397	-3.012	1.13x10-9	8.9461	2.12x10-7
